# Supplementary material for: Maternal Sildenafil vs Placebo in Pregnant Women With Severe Early-Onset Fetal Growth Restriction: A Randomized Clinical Trial
Source: PubMed Central journal article supplement (PMC7301225; doi:10.1001/jamanetworkopen.2020.5323), 2020-06-17
Supplement: jamanetwopen-3-e205323-s003.pdf [file jamanetwopen-3-e205323-s003.pdf]

## Data Sharing Statement

Pels. Maternal Sildenafil vs Placebo in Pregnant Women With Severe Early-Onset Fetal Growth Restriction. *JAMA Netw Open*. Published June 17, 2020. 10.1001/jamanetworkopen.2020.5323

### Data

**Data available:** Yes

**Data types:** Deidentified participant data

**How to access data:** [j.w.ganzevoort@amsterdamumc.nl](mailto:j.w.ganzevoort@amsterdamumc.nl)

**When available:** With publication

### Supporting Documents

**Document types:** Statistical/analytic code

**How to access documents:** [j.w.ganzevoort@amsterdamumc.nl](mailto:j.w.ganzevoort@amsterdamumc.nl)

**When available:** With publication

### Additional Information

**Who can access the data:** researchers whose proposed use of the data has been approved

**Types of analyses:** for a specified purpose

**Mechanisms of data availability:** with a signed data access agreement
